# Supplementary material for: Prevalence of deleterious ATM germline mutations in gastric cancer patients
Source: PubMed Central journal article supplement (PMC4747381; doi:10.18632/oncotarget.5944), 2015-10-23
Supplement: oncotarget-06-40953-s001.pdf [file oncotarget-06-40953-s001.pdf]

# Prevalence of deleterious *ATM* germline mutations in gastric cancer patients

## Supplementary Material

### a. Individual II-7

Composite traces

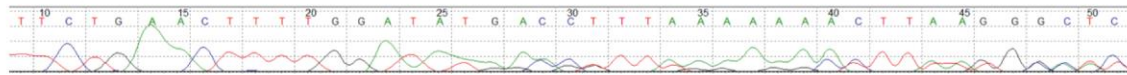

Normal trace

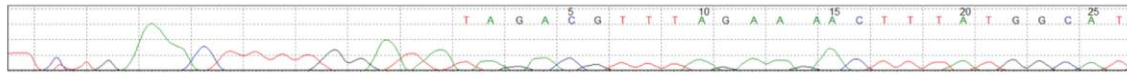

Mutant trace

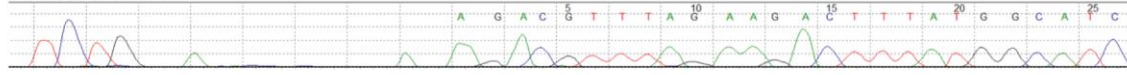

↑  
c.3609delT; p.Y1203fs

### b. Individual II-4

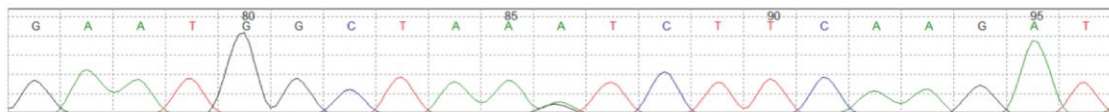

↑  
c.3668A>G; p.N1223S

**Supplementary Figure 1.** Traces of Sanger sequencing for blood DNAs from individual II-7 (a) and individual II-4 (b). The positions of *ATM* c.3609delT;p.Y1203fs AND c.3668A>AG;p.N1223S were indicated by arrows, separately.

a. Peripheral blood

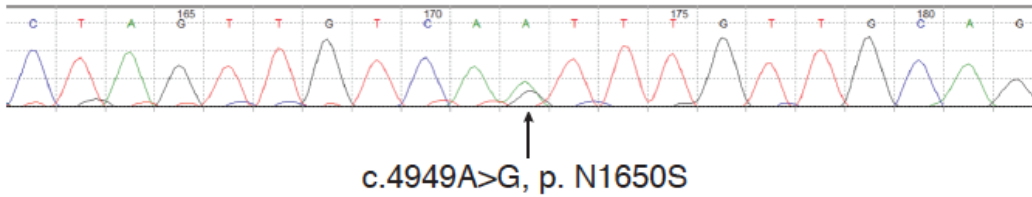

b. Tumor

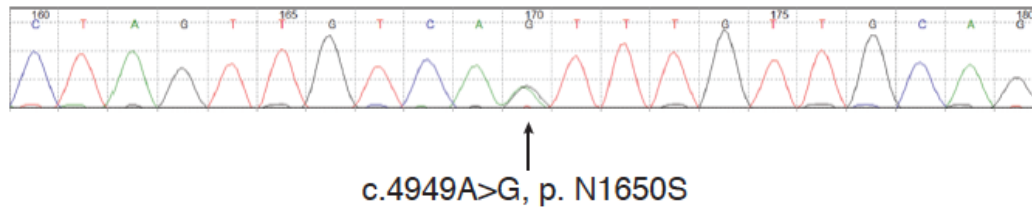

c. Lymph node metastasis

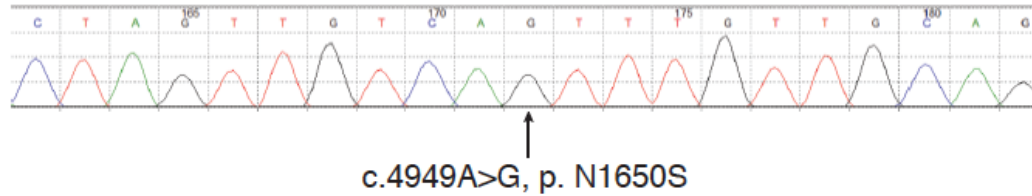

**Supplementary Figure 2.** Loss of heterozygosity for the *ATM* mutation

c.4949A>G;p. N1650S in one patient. Traces of Sanger sequencing were shown for DNAs from a. Peripheral blood; b. Tumor tissue; c. Lymph nodes metastasis.

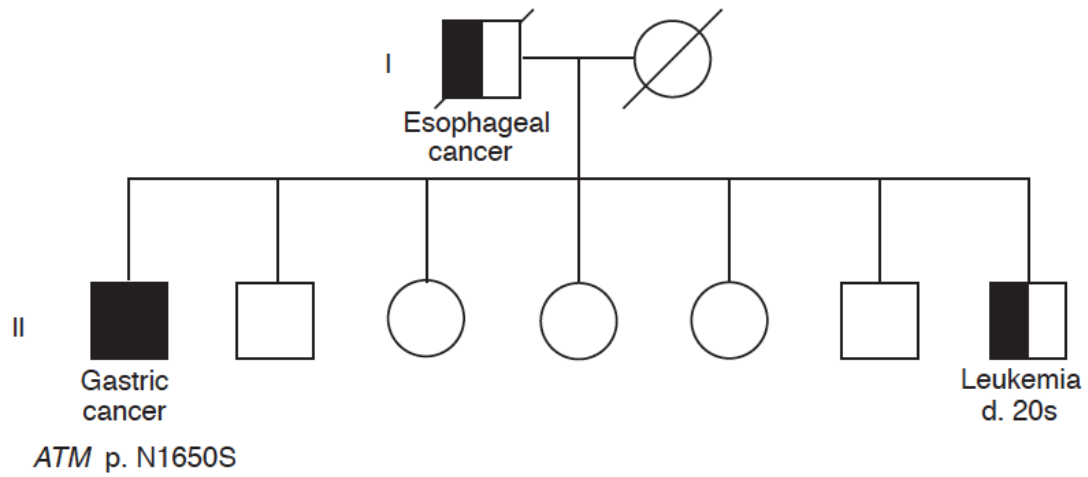

**Supplementary Figure 3.** Pedigree of the family of the patient with the *ATM* c.4949A>G;p. N1650S germline mutation. The patient with gastric cancer are shaded in black. Half-shaded symbols indicate individuals with non-gastric cancers. Generation I-II are indicated.

**Supplementary Table 1.** 83 genes used in the custom-designed panel.

|        |        |         |        |        |
|--------|--------|---------|--------|--------|
| ALK    | APC    | ATM     | BARD1  | BLM    |
| BMPR1A | BRAF   | BRIP1   | CASP10 | CDH1   |
| CDK4   | CDKN2A | CHEK2   | DICER1 | DPYD   |
| ELAC2  | EPCAM  | FANCA   | FANCB  | FANCC  |
| FANCD2 | FANCE  | FANCF   | FANCG  | FANCI  |
| FANCL  | FANCM  | FH      | FLCN   | KRAS   |
| MAP2K1 | MEN1   | MET     | MITF   | MLH1   |
| MRE11A | MSH2   | MSH6    | MUTYH  | NBN    |
| NF1    | NF2    | NRAS    | PALB2  | PHOX2B |
| PMS1   | PMS2   | PRKAR1A | PTCH1  | PTEN   |
| PTPN11 | RAD50  | RAD51C  | RAF1   | RB1    |
| RECQL4 | RET    | RPL11   | RPL35A | RPL5   |
| RPS10  | RPS17  | RPS19   | RPS24  | RPS26  |
| RPS7   | SDHB   | SDHC    | SDHD   | SH2D1A |
| SMAD4  | SOS1   | STK11   | TP53   | TSC1   |
| TSC2   | TYMS   | VHL     | WT1    | XIAP   |
| XPA    | XPC    | ZMAT3   |        |        |

**Supplementary Table 2.** Summary of sequencing statistics for individual II-2, II-4, II-5 and II-7 in the Sichuan Chinese family.

| Individual                                      | II-2      | II-4      | II-5      | II-7      |
|-------------------------------------------------|-----------|-----------|-----------|-----------|
| Read length (bp)                                | 75        | 75        | 75        | 75        |
| Bases mapped to genome                          | 140356920 | 185843881 | 197029585 | 241072641 |
| Bases mapped to targeted region                 | 60770967  | 49644362  | 50299432  | 69462652  |
| Fraction of bases with at least 10 unique reads | 94.94%    | 90.98%    | 93.36%    | 94.45%    |
| Effective coverage                              | 107.41    | 94.19     | 90.24     | 124.39    |
| Total number of variants in designed regions    | 75        | 80        | 88        | 79        |
| Number of variants that are homo-zygous         | 41        | 37        | 36        | 34        |
| Number of variants that are hetero-zygous       | 34        | 43        | 52        | 45        |
| Number of variants with MAF>1% in 1000 genome   | 66        | 68        | 75        | 70        |
| Number of variants in snp database              | 74        | 78        | 85        | 77        |

**Supplementary Table 3.** Predicted pathogenicity of three germline variants in TCGA cohort of 335 gastric cancer patients.

| Nucleotide (genomic) | Nucleotide (cDNA) | Amino acid | SIFT prediction | Polyphen2 prediction (HumDiv) | Polyphen2 prediction (HumVar) | MutationTaster predicton |
|----------------------|-------------------|------------|-----------------|-------------------------------|-------------------------------|--------------------------|
| 11:108216616T>G      | c.8565T>G         | p.S2855R   | Damaging        | Probably damaging             | Probably damaging             | Disease Causing          |
| 11:108186638G>A      | c.6095G>A         | p.R2032K   | Tolerated       | Probably damaging             | Possibly damaging             | Disease Causing          |
| 11:108199929T>G      | c.7271T>G         | p.V2424G   | Damaging        | Probably damaging             | Probably damaging             | Disease Causing          |

**Supplementary Table 4.** Deleterious alleles of *ATM* in 1000 genome project data.

| Nucleotide (genomic) | Nucleotide (cDNA) | Amino acid | Type     | Dbsnp ID    | References                |
|----------------------|-------------------|------------|----------|-------------|---------------------------|
| 11:108121788C>A      | c.C1596A          | p.C532X    | Nonsense | NA          | NA                        |
| 11:108155138C>T      | c.C3931T          | p.Q1311X   | Nonsense | rs200976093 | NA                        |
| 11:108115654C>T      | c.C802T           | p.Q268X    | Nonsense | NA          | NA                        |
| 11:108117828G>T      | c.G1039T          | p.E347X    | Nonsense | NA          | NA                        |
| 11:108142134G>T      | c.3077+1G>T       |            | Splicing | NA          | NA                        |
| 11:108170506         | c.A5071C          | p.S1691R   | Missense | rs1800059   | Stankovic et al.,<br>1998 |
